# Supplementary material for: High-Throughput 3D Phenotyping of Plant Shoot Apical Meristems From Tissue-Resolution Data
Source: PubMed Central journal article supplement (PMC9062647; doi:10.3389/fpls.2022.827147), 2022-04-18
Supplement: Data_Sheet_1.pdf [file Data_Sheet_1.pdf]

*Supplementary Material*

# 1 Supplementary Figures and Tables

## 1.1 Supplementary Figures

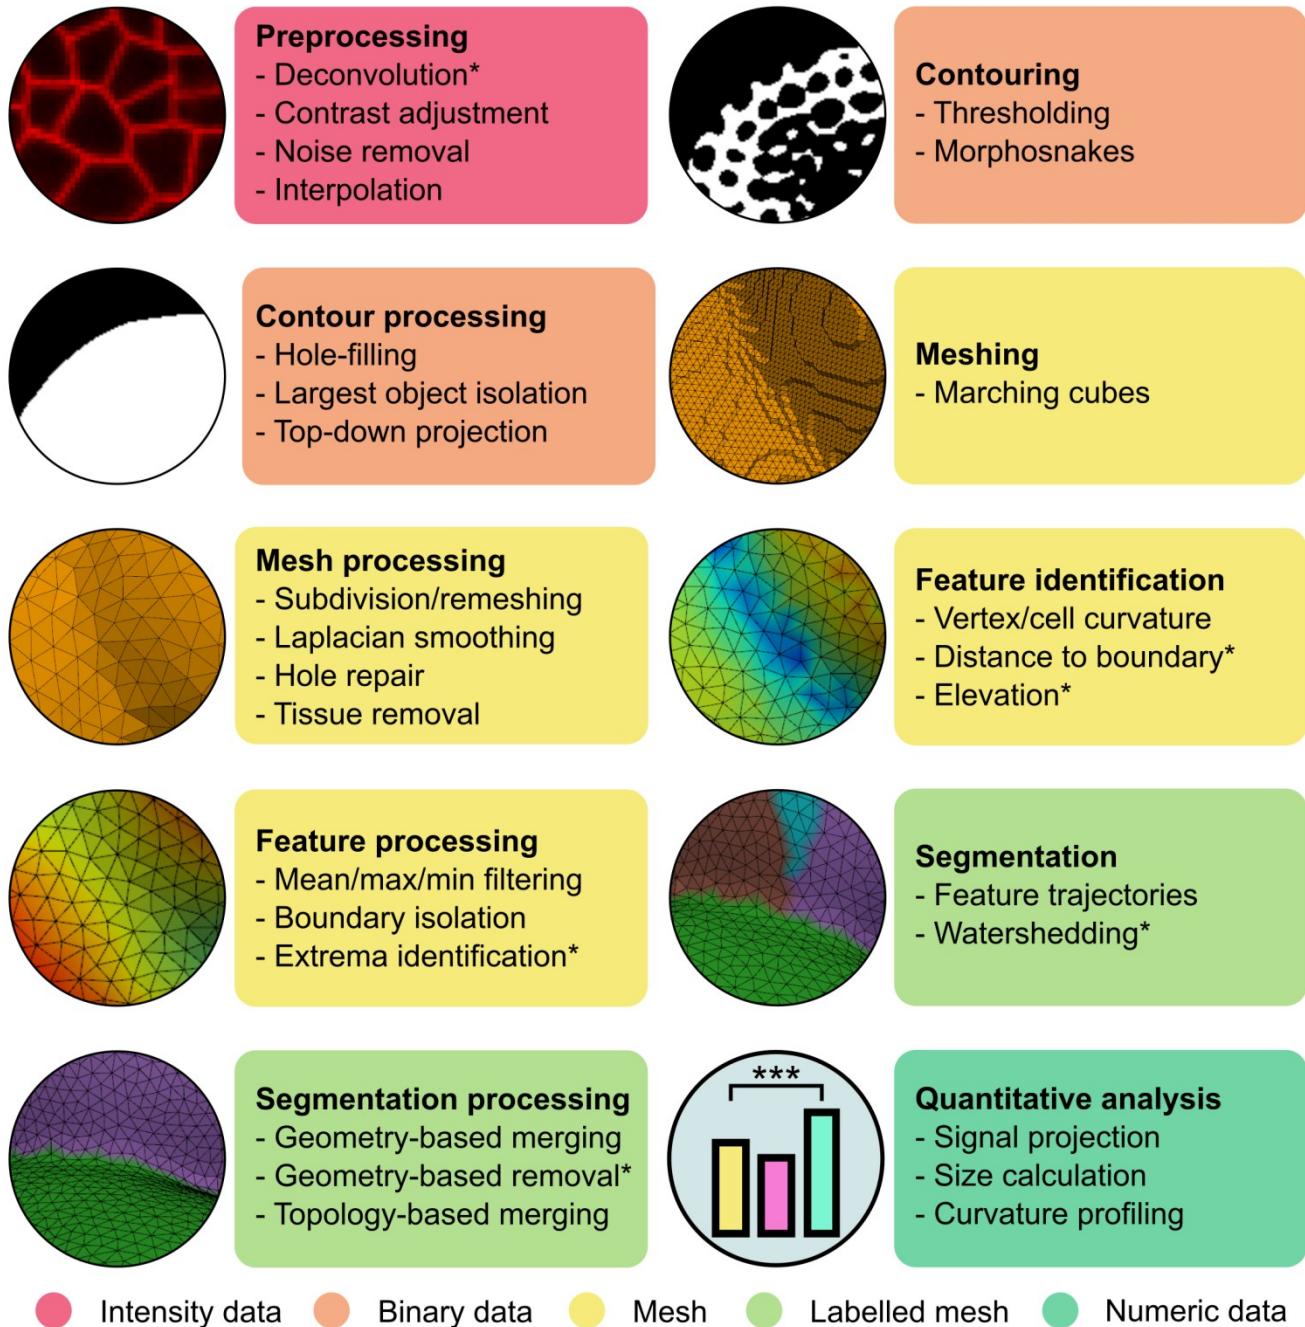

**Supplementary Figure 1: Graphical illustration of the quantification pipeline including example methods pertaining to the corresponding processing step.** The categories are performed in order left to right order, top to bottom. Each category textbox lists exemplary steps which can be performed in relation to each processing category. Sub-steps marked with an asterisk (\*) were not performed in this study. Circular inset graphics show examples of the data type and appearance subsequent to the corresponding processing step. For a detailed description of the processing steps, see Methods.

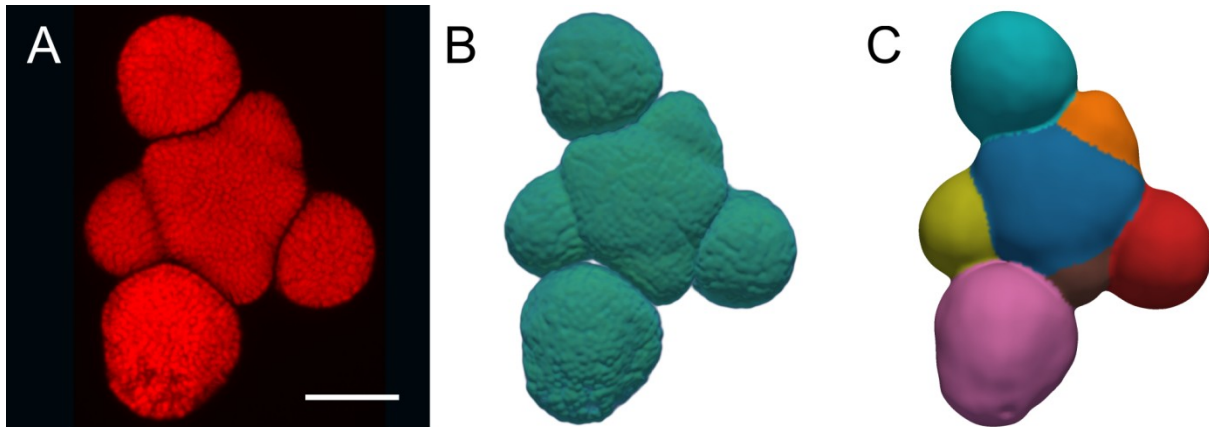

**Supplementary Figure 2: Successful tissue-level segmentation of injured plant tissue**

Illustrative example of a successful segmentation of an injured *Arabidopsis thaliana* SAM. **(A)** Summed projection of the raw confocal data. The shoot was injured during acquisition, and the subsequent propidium iodide staining dyed the entire cells, rendering an opaque tissue. Consequently, single-cell segmentation would not have been possible. Scale bar: 75  $\mu\text{m}$ . **(B)** 3D Volume render of the raw confocal data. **(C)** Successful surface segmentation of the tissue substructures following application of our protocol (Methods). Individual substructures are coloured according to their corresponding segmentation label. Scale in **(B-C)** further to **(A)**. Colouring in **(A-B)** shows the corresponding signal intensity magnitude in arbitrary units; **(C)** is coloured by integer label value.

## Supplementary Material

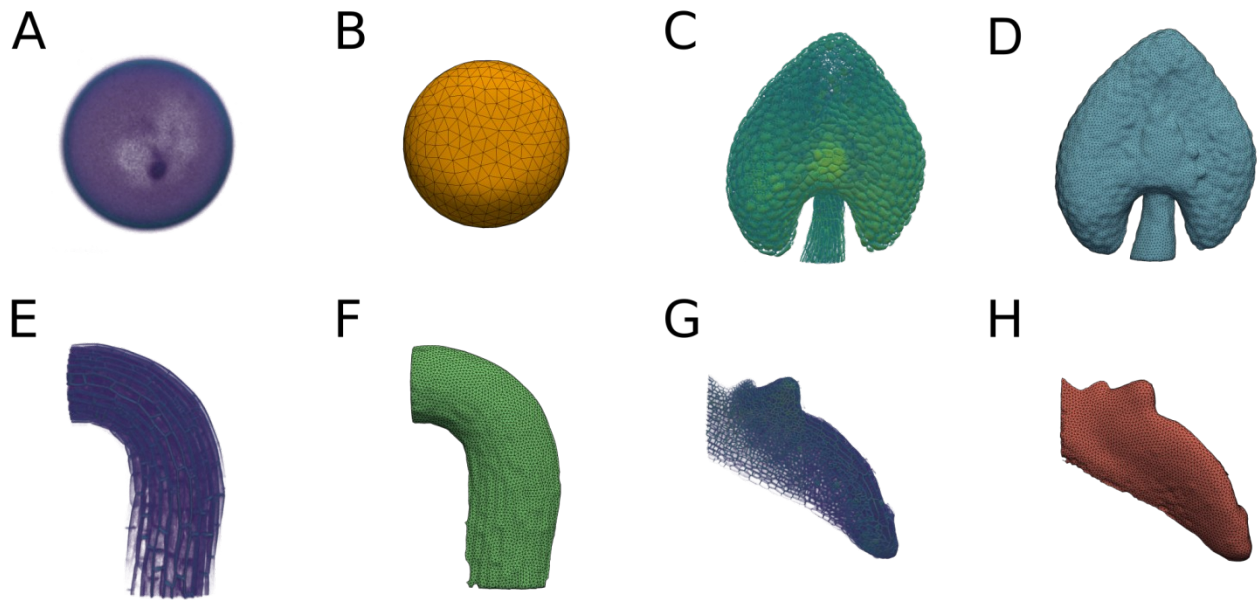

### Supplementary Figure 3: Illustration of capabilities for surface generation on a diverse set of plant tissues

Collection of raw confocal data and generated surfaces for a collection of different plant tissues. **(A-B)** Protoplast and corresponding surface; **(C-D)** Anther and corresponding surface. **(E-F)** Apical hook and corresponding surface. **(G-H)** Leaf blade and corresponding surface. Approximate scales in terms of maximal extent, left to right: **(A-B)** 10  $\mu\text{m}$ , **(C-D)** 350  $\mu\text{m}$ , **(E-F)** 300  $\mu\text{m}$ , **(G-H)** 400  $\mu\text{m}$ . Colouring in **(A, C, E, H)** shows the signal intensity magnitude in arbitrary units; **(B, D, F, H)** are false-coloured. For data origins, see Data Availability Statement.

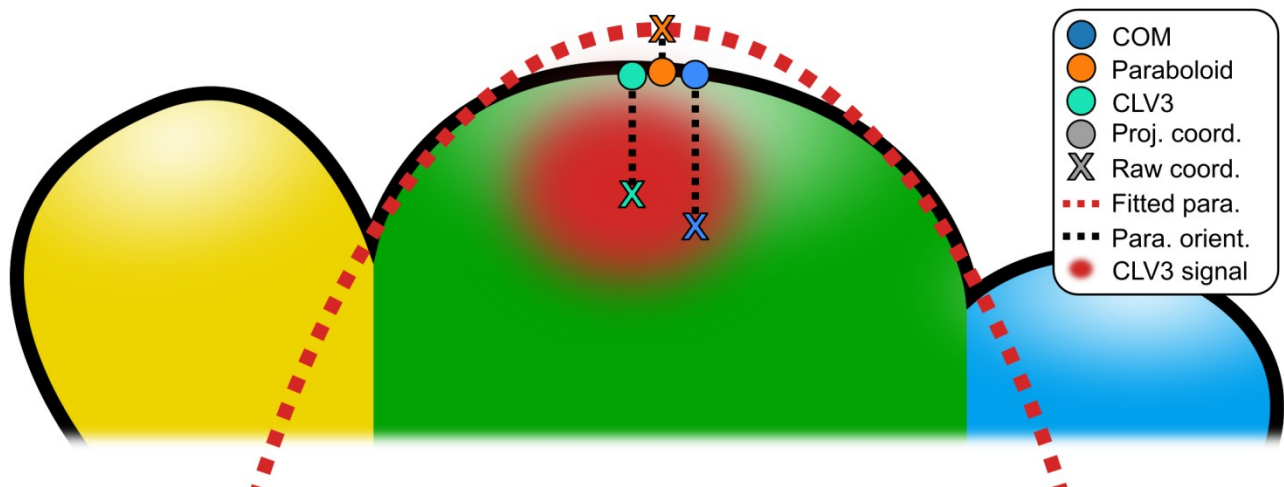

### Supplementary Figure 4: Conceptual 2D illustration of the apex coordinate quantification framework

Graphical illustration of the plant shoot. A paraboloid is fitted to a surface mesh of the inflorescence meristem, and the corresponding apex coordinates are subsequently derived by projection to the mesh (Methods). In wild-type plants, the tissue is first segmented to remove flower organs (yellow and blue), and isolate the SAM (green); in NPA-treated plants, no initial organ-removal is needed (Methods). The paraboloid fit is exaggerated for illustrative purposes.

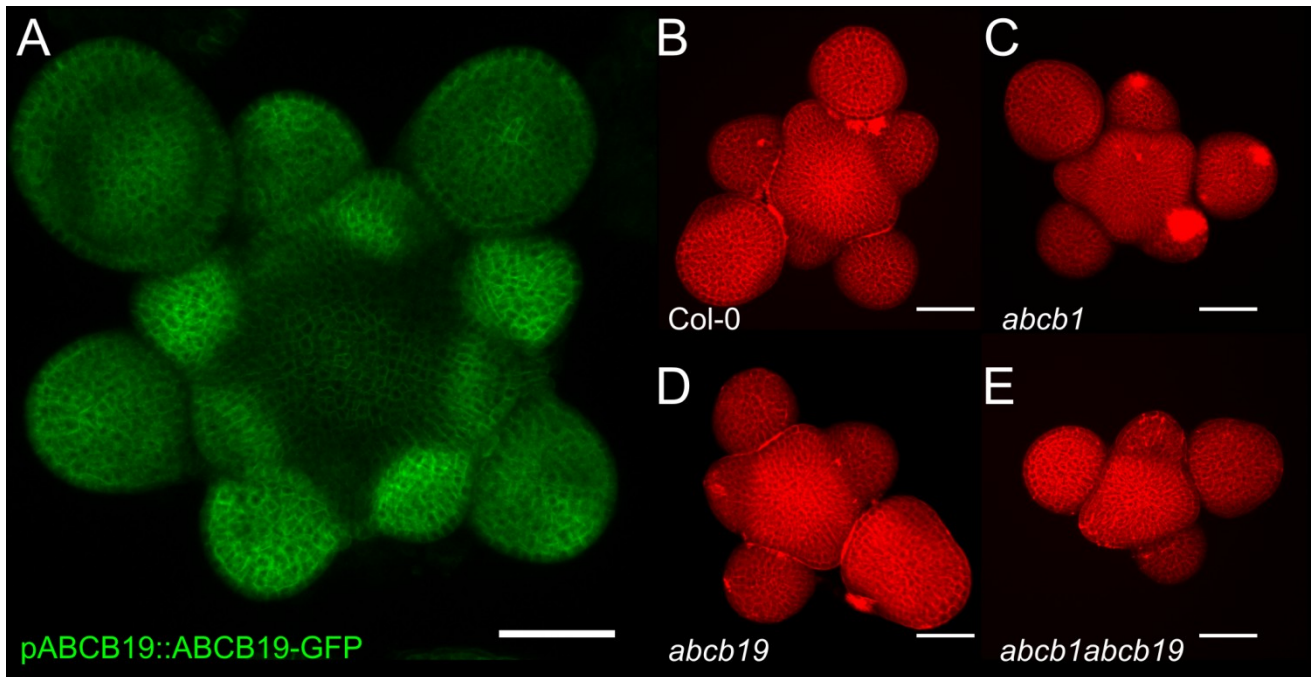

**Supplementary Figure 5: *ABCB19* expression is upregulated in early flower primordia**

(A) Summed projection in the apical-basal direction of fluorescent expression of a SAM expressing *pABCB19::ABCB19-GFP*. Early flower primordia of developmental stage 1 to early stage 3 exhibit upregulated expression. Wassilewskija ecotype. (B-E) Same as (A), but for propidium iodide stained plants, illustrating the shoot morphology in representative Col-0 (B), *abcb1* (C), *abcb19* (D) and *abcb1abcb19* (E) plants. Mutations in the *ABCB* gene family perturb the shoot morphology relative to the wild type plants. Scale bars: 50  $\mu$ m.

Supplementary Material

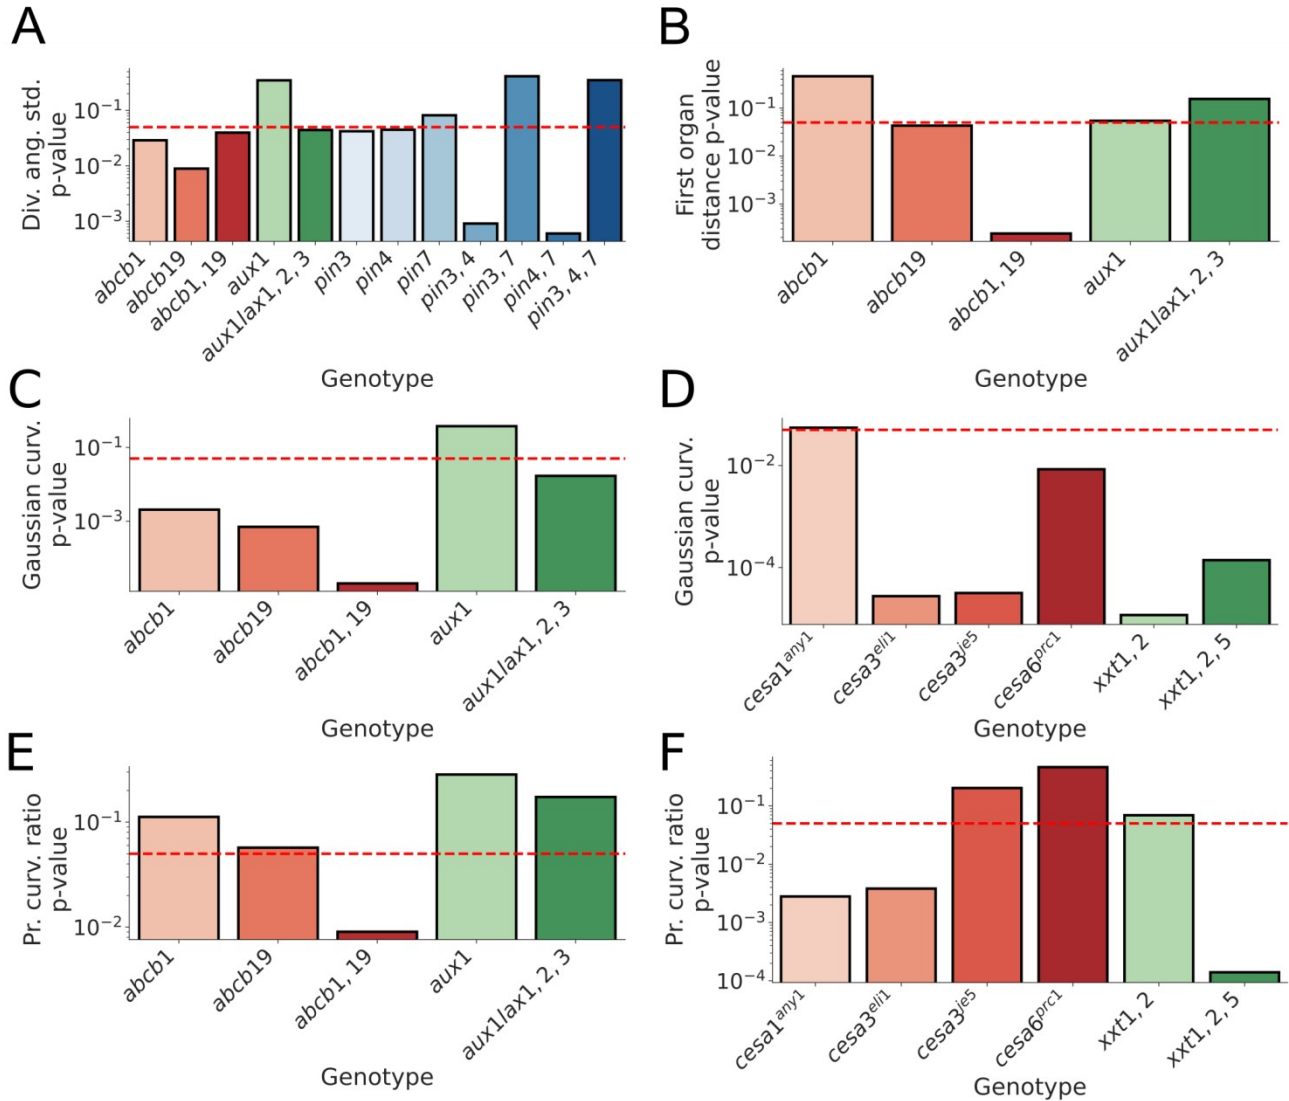

**Supplementary Figure 6: P-value outcome for significance tests between genotype distributions**

Corresponding p-values for the distributions of various statistical variables, namely the **(A)** Divergence angle standard deviation for the extended auxin transport dataset; **(B)** First organ distance for the auxin transport dataset; **(C)** Gaussian curvatures for the auxin transport dataset; **(D)** Gaussian curvatures for the mechanical dataset; **(E)** Principal curvatures for the auxin transport dataset; **(F)** Principal curvatures for the mechanical dataset. All statistical tests refer to MWW tests (Methods). Red dashed lines are refer to the canonical significance threshold,  $p = 0.05$  (\*).

## 1.2 Supplementary Tables

**Supplementary Table 1: Plant material, abbreviations and origin**

| <b>Genotype</b>                       | <b>In-text abbreviation</b>   | <b>Reference</b>          |
|---------------------------------------|-------------------------------|---------------------------|
| <i>Col-0</i>                          |                               |                           |
| <i>abcb1</i>                          |                               | van Rongen et al., 2019   |
| <i>abcb19</i>                         |                               | van Rongen et al., 2019   |
| <i>abcb1abcb19</i>                    | <i>abcb1,19</i>               | van Rongen et al., 2019   |
| <i>aux1</i>                           |                               | Bainbridge et al., 2008   |
| <i>aux1lax1lax2lax3</i>               | <i>aux1lax1,2,3</i>           | Bainbridge et al., 2008   |
| <i>pin3</i>                           |                               | van Rongen et al., 2019   |
| <i>pin4</i>                           |                               | van Rongen et al., 2019   |
| <i>pin7</i>                           |                               | van Rongen et al., 2019   |
| <i>pin3pin4</i>                       | <i>pin3,4</i>                 | van Rongen et al., 2019   |
| <i>pin3pin7</i>                       | <i>pin3,7</i>                 | van Rongen et al., 2019   |
| <i>pin4pin7</i>                       | <i>pin4,7</i>                 | van Rongen et al., 2019   |
| <i>pin3pin4pin7</i>                   | <i>pin3,4,7</i>               | van Rongen et al., 2019   |
| <i>cesa1<sup>any1</sup></i>           |                               | Fujita et al., 2013       |
| <i>cesa3<sup>eli1</sup></i>           |                               | Caño-Delgado et al., 2003 |
| <i>cesa3<sup>je5</sup></i>            |                               | Desprez et al., 2007      |
| <i>cesa6<sup>prc1-1</sup></i>         |                               | Fagard et al., 2000       |
| <i>xxt1xxt2</i>                       | <i>xxt1,2</i>                 | Xiao et al., 2016         |
| <i>xxt1xxt2xxt5</i>                   | <i>xxt1,2,5</i>               | Xiao et al., 2016         |
| <i>pCLV3::dsRed x pUBQ10::myr-YFP</i> | <i>pCLV3::dsRed x myr-YFP</i> | Willis et al., 2016       |
| <i>pABCB19::ABCB19-GFP</i>            |                               | van Rongen et al., 2019   |
